# Supplementary material for: Efficient and high para-selective conversion of toluene with NO2 to para-nitrotoluene in an O2–Ac2O–HβD4 composite catalytic system
Source: Royal Society of Chemistry journal article supplement (doi:10.1039/d3cy01045g), 2024-01-01
Supplement: d3cy01045g1.pdf [file d3cy01045g1.pdf]

## Supporting Information

### **Efficient and high *para*-selective conversion of toluene with NO<sub>2</sub> to *para*-nitrotoluene in an O<sub>2</sub>-Ac<sub>2</sub>O-HβD4 composite catalytic system**

Renjie Deng<sup>1,2,\*</sup>, Huajie Liu<sup>1,2</sup>, Haishuai Cui<sup>1</sup>, Yao Tian<sup>1</sup>, Hai Yang<sup>1,2</sup>

<sup>1</sup> *College of Material and Chemical Engineering, Hunan Institute of Engineering, Xiangtan 411104, P.R. China*

<sup>2</sup> *Hunan Province Key Laboratory of Environmental Catalysis and Waste Rechemistry, Hunan Institute of Engineering, Xiangtan 411104, P.R. China*

#### **\* Corresponding author**

*E-mail address:* rjdeng@hnie.edu.cn\_\_\_\_\_ (R. Deng)

**This document contains:**

**Figure S1.** XRD patterns of samples.

**Figure S2** TG/DTG curves of samples.

**Figure S3.** FT-IR spectra of (a) fresh H $\beta$  (40), (b) H $\beta$ D1, (c) H $\beta$ D2, (d) H $\beta$ D3, (e) H $\beta$ D4, (f) H $\beta$ D6 samples.

**Table S1.** Effect of catalyst amount on the nitration reaction.

**Table S2.** Effect of the amount of Ac<sub>2</sub>O in the catalytic nitration reaction.

**Table S3** Schematic diagram and size of and various nitration produces and the pore diameter of treated catalyst.

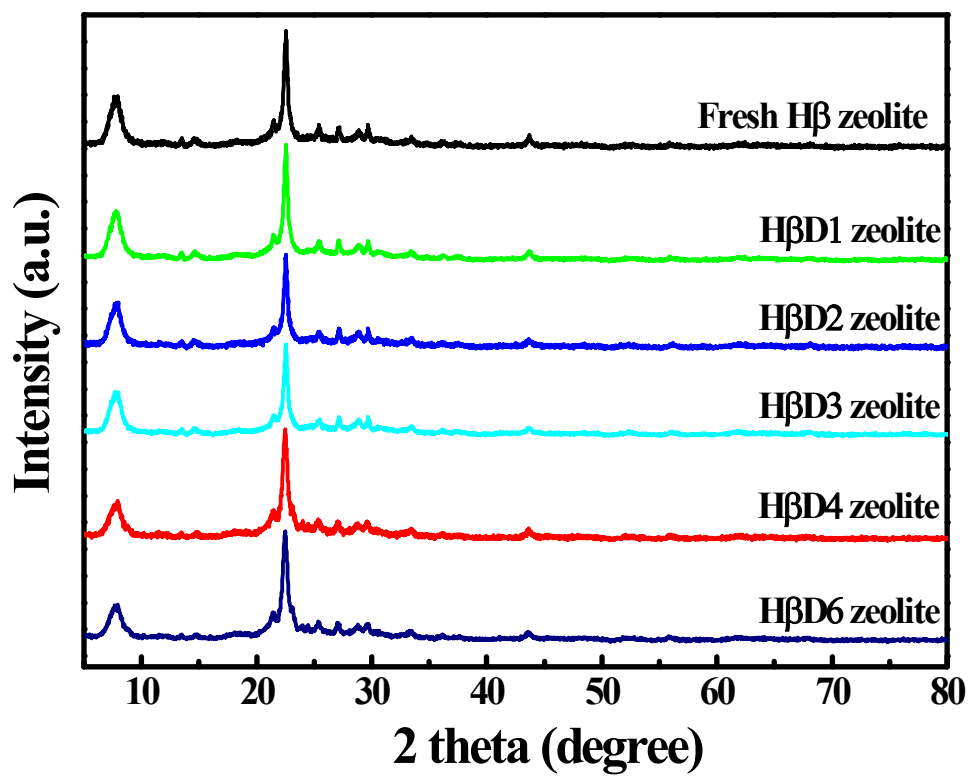

Figure S1. XRD patterns of samples.

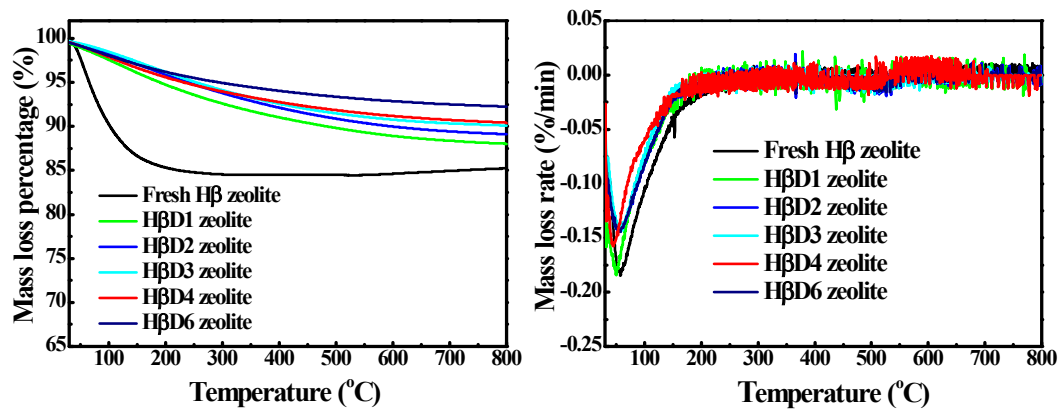

Figure S2. TG/DTG curves of samples.

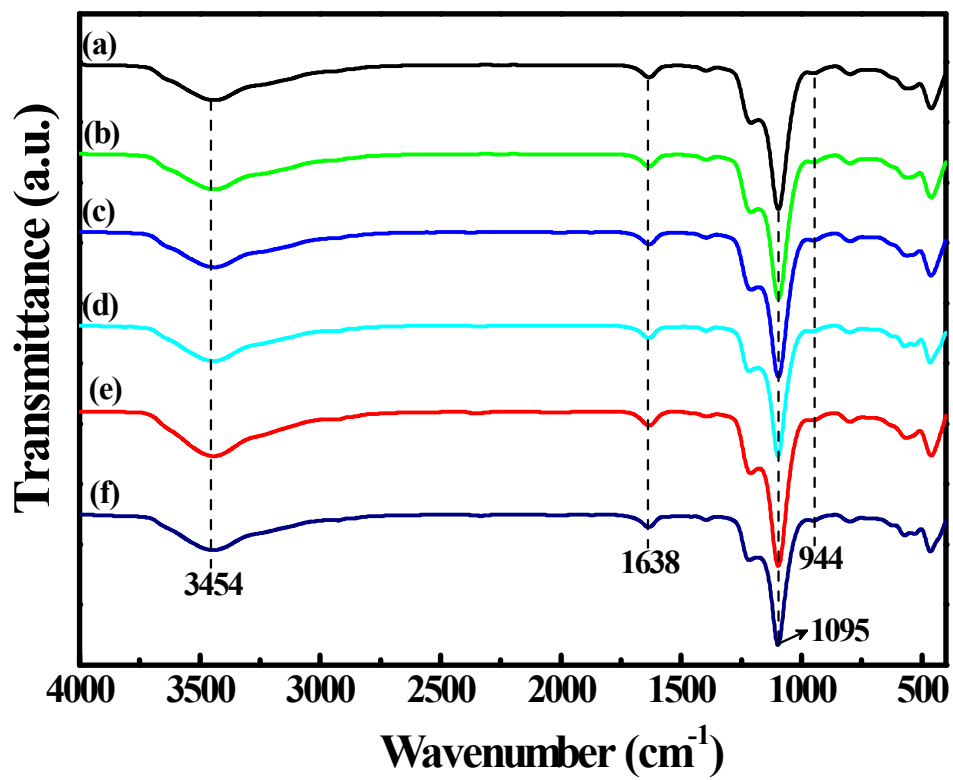

**Figure S3.** FT-IR spectra of (a) fresh H $\beta$  (40), (b) H $\beta$ D1, (c) H $\beta$ D2, (d) H $\beta$ D3, (e) H $\beta$ D4, (f) H $\beta$ D6 samples.

**Table S1.** Effect of catalyst amount on the nitration reaction <sup>a</sup>.

| Amount of H $\beta$ D4<br>(g) | Conversion<br>(%) | Selectivity (%) |              |              | The ratio<br>of <i>p/o</i> |
|-------------------------------|-------------------|-----------------|--------------|--------------|----------------------------|
|                               |                   | <i>o</i> -NT    | <i>m</i> -NT | <i>p</i> -NT |                            |
| 0.5                           | 69.8              | 27.7            | 5.9          | 66.4         | 2.4                        |
| 1                             | 70.1              | 25.7            | 5.6          | 68.7         | 2.7                        |
| 1.5                           | 78.1              | 22.5            | 5.7          | 71.8         | 3.2                        |
| 2                             | 78.3              | 22.9            | 5.5          | 71.6         | 3.1                        |
| 2.5                           | 78.5              | 22.5            | 5.6          | 71.9         | 3.2                        |

<sup>a</sup> Reaction conditions: reaction temperature was 35 °C, the toluene:NO<sub>2</sub> molar ratio was 1:2, reaction time was 4 h, O<sub>2</sub> pressure was 0.5 MPa, and the amount of Ac<sub>2</sub>O was 10.0 g.

**Table S2.** Effect of the amount of Ac<sub>2</sub>O in the catalytic nitration reaction<sup>a</sup>.

| Amount of Ac <sub>2</sub> O (g) | Conversion (%) | Selectivity (%) |      |      | p/o ratio |
|---------------------------------|----------------|-----------------|------|------|-----------|
|                                 |                | o-NT            | m-NT | p-NT |           |
| 1.0                             | 65.3           | 25.7            | 6.1  | 68.2 | 2.7       |
| 5.0                             | 71.4           | 23.8            | 5.9  | 70.3 | 3.0       |
| 10.0                            | 78.1           | 22.5            | 5.7  | 71.8 | 3.2       |
| 15.0                            | 72.3           | 22.5            | 5.8  | 71.7 | 3.2       |
| 20.0                            | 68.5           | 22.8            | 5.7  | 71.5 | 3.1       |

<sup>a</sup> Reaction conditions: reaction temperature was 35 °C, toluene:NO<sub>2</sub> molar ratio was 1:2, reaction time was 4 h, O<sub>2</sub> pressure was 0.5 MPa, and the amount of HβD4 was 1.5 g.

**Table S3** Schematic diagram and size of and various nitration produces and the pore diameter of treated catalyst

| Subtract     | Front view                                                                          | Side view                                                                            | Minimum diameter of cross section (nm) | Pore diameter of treated catalyst (nm) |
|--------------|-------------------------------------------------------------------------------------|--------------------------------------------------------------------------------------|----------------------------------------|----------------------------------------|
| Toluene      | 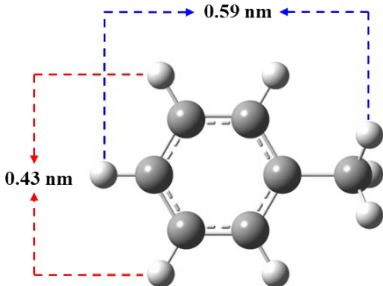  |   | 0.43                                   | 0.55                                   |
| <i>o</i> -NT |  |  | 0.61                                   |                                        |



---

*m*-NT

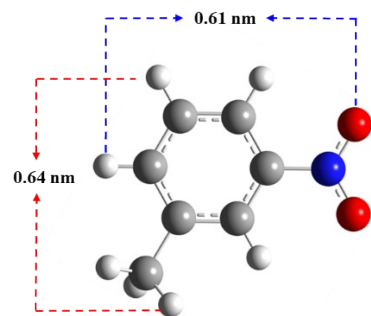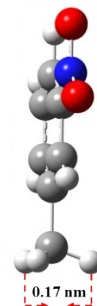

0.61

*p*-NT

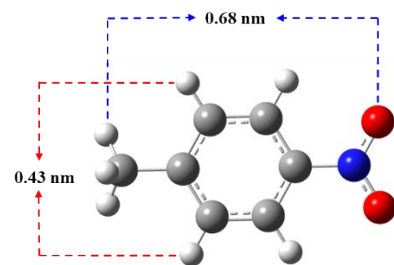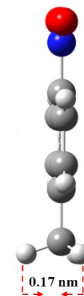

0.43

---
